# Supplementary material
Source: PubMed Central journal article supplement (PMC4105053)
Supplement: ja504688z_si_001.pdf [file ja504688z_si_001.pdf]

Supporting Information for

**Electron transfer control in soluble methane monooxygenase**

Weixue Wang<sup>1</sup>, Roxana E. Iacob<sup>2</sup>, Rebecca P. Luoh<sup>3</sup>, John R. Engen<sup>2</sup>, and Stephen J. Lippard<sup>1\*</sup>

<sup>1</sup>Department of Chemistry and <sup>3</sup>Department of Biological Engineering, Massachusetts Institute of Technology, Cambridge, Massachusetts 02139, United States. <sup>2</sup>Department of Chemistry & Chemical Biology, Northeastern University, Boston, Massachusetts 02115, United States.

**Contents**

**Figure S1.** Amino acid sequence and peptic peptide coverage for MMOH.

**Figure S2.** Deuterium incorporation graphs for the peptic peptides that were followed by HDX MS for MMOH free (red) and bound to MMOR-Fd (blue).

**Figure S3.** Fluorescence anisotropy titration of MMOH into MMOB  $\Delta$ 2-33 labeled with IAEDANS, for  $K_d$  determination.

**Figure S4.** Fluorescence anisotropy titration of MMOR into a mixture of 1  $\mu$ M MMOH and 1  $\mu$ M IAEDANS labeled full length MMOB.

**Figure S5.** MMOB inhibits electron transfer using chemically reduced full length MMOR as the electron source.

**Table S1.** Primers used for making mutant proteins

MMOH  $\alpha$ -subunit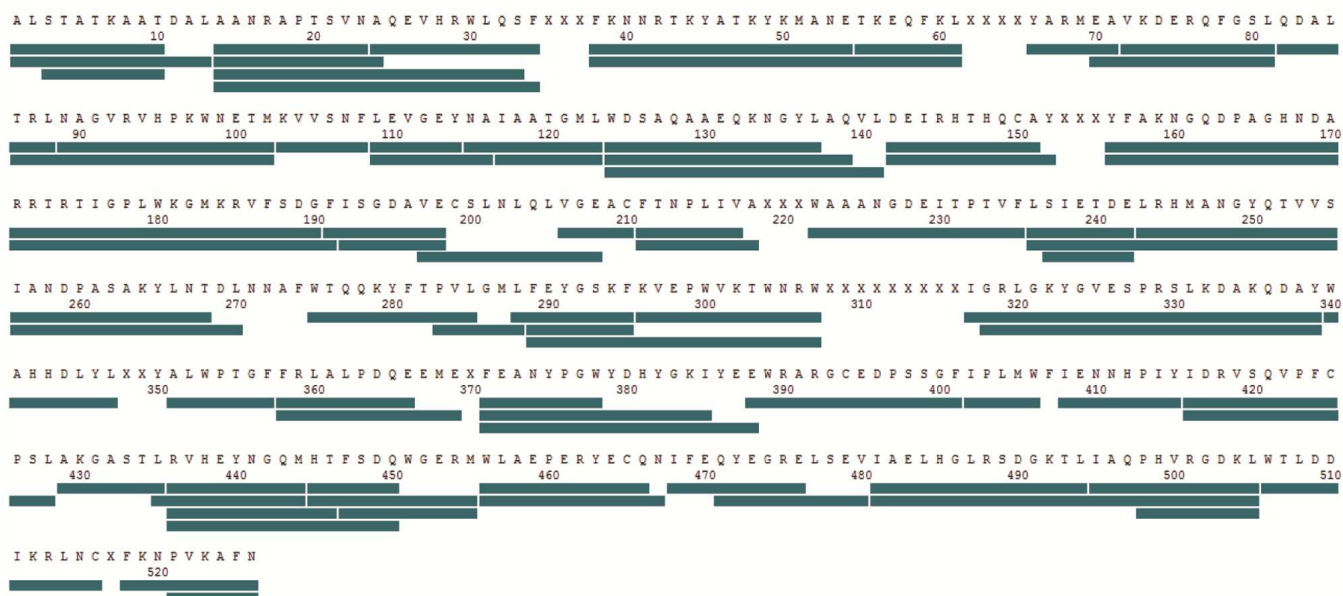

Total: 81 Peptides, 93.9% Coverage, 1.96 Redundancy

MMOH  $\beta$ -subunit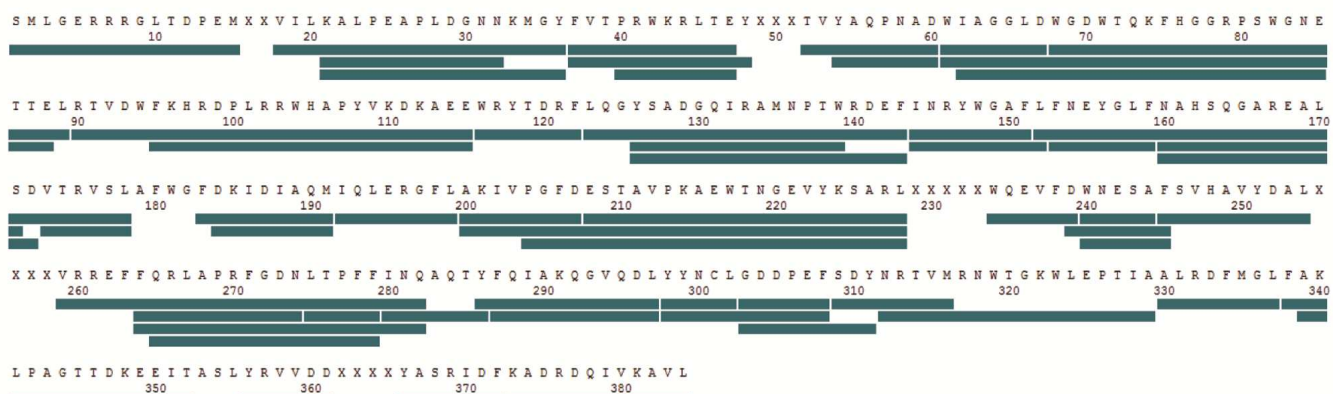

Total: 58 Peptides, 93.5% Coverage, 2.07 Redundancy

MMOH  $\gamma$ -subunit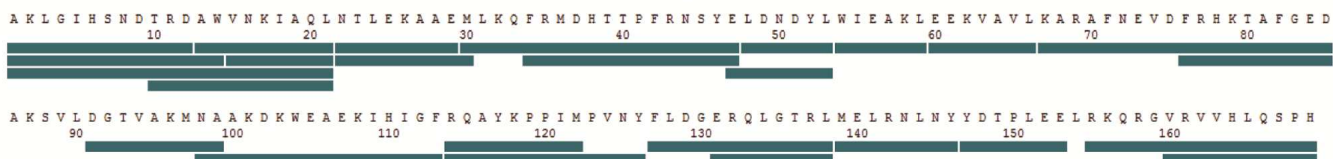

Total: 26 Peptides, 96.4% Coverage, 1.75 Redundancy

**Figure S1.** Amino acid sequence and peptic peptide coverage for MMOH. Each colored bar under the sequence corresponds to a peptic peptide that was identified and followed by HDX MS analysis. A total of 93.9% linear coverage was obtained for the  $\alpha$ -subunit, 93.5% for  $\beta$ -subunit and 96.4% for the  $\gamma$ -subunit. This protein coverage map was generated using the DynamX 2.0 software package (Waters Corp).

MMOH  $\alpha$ -subunit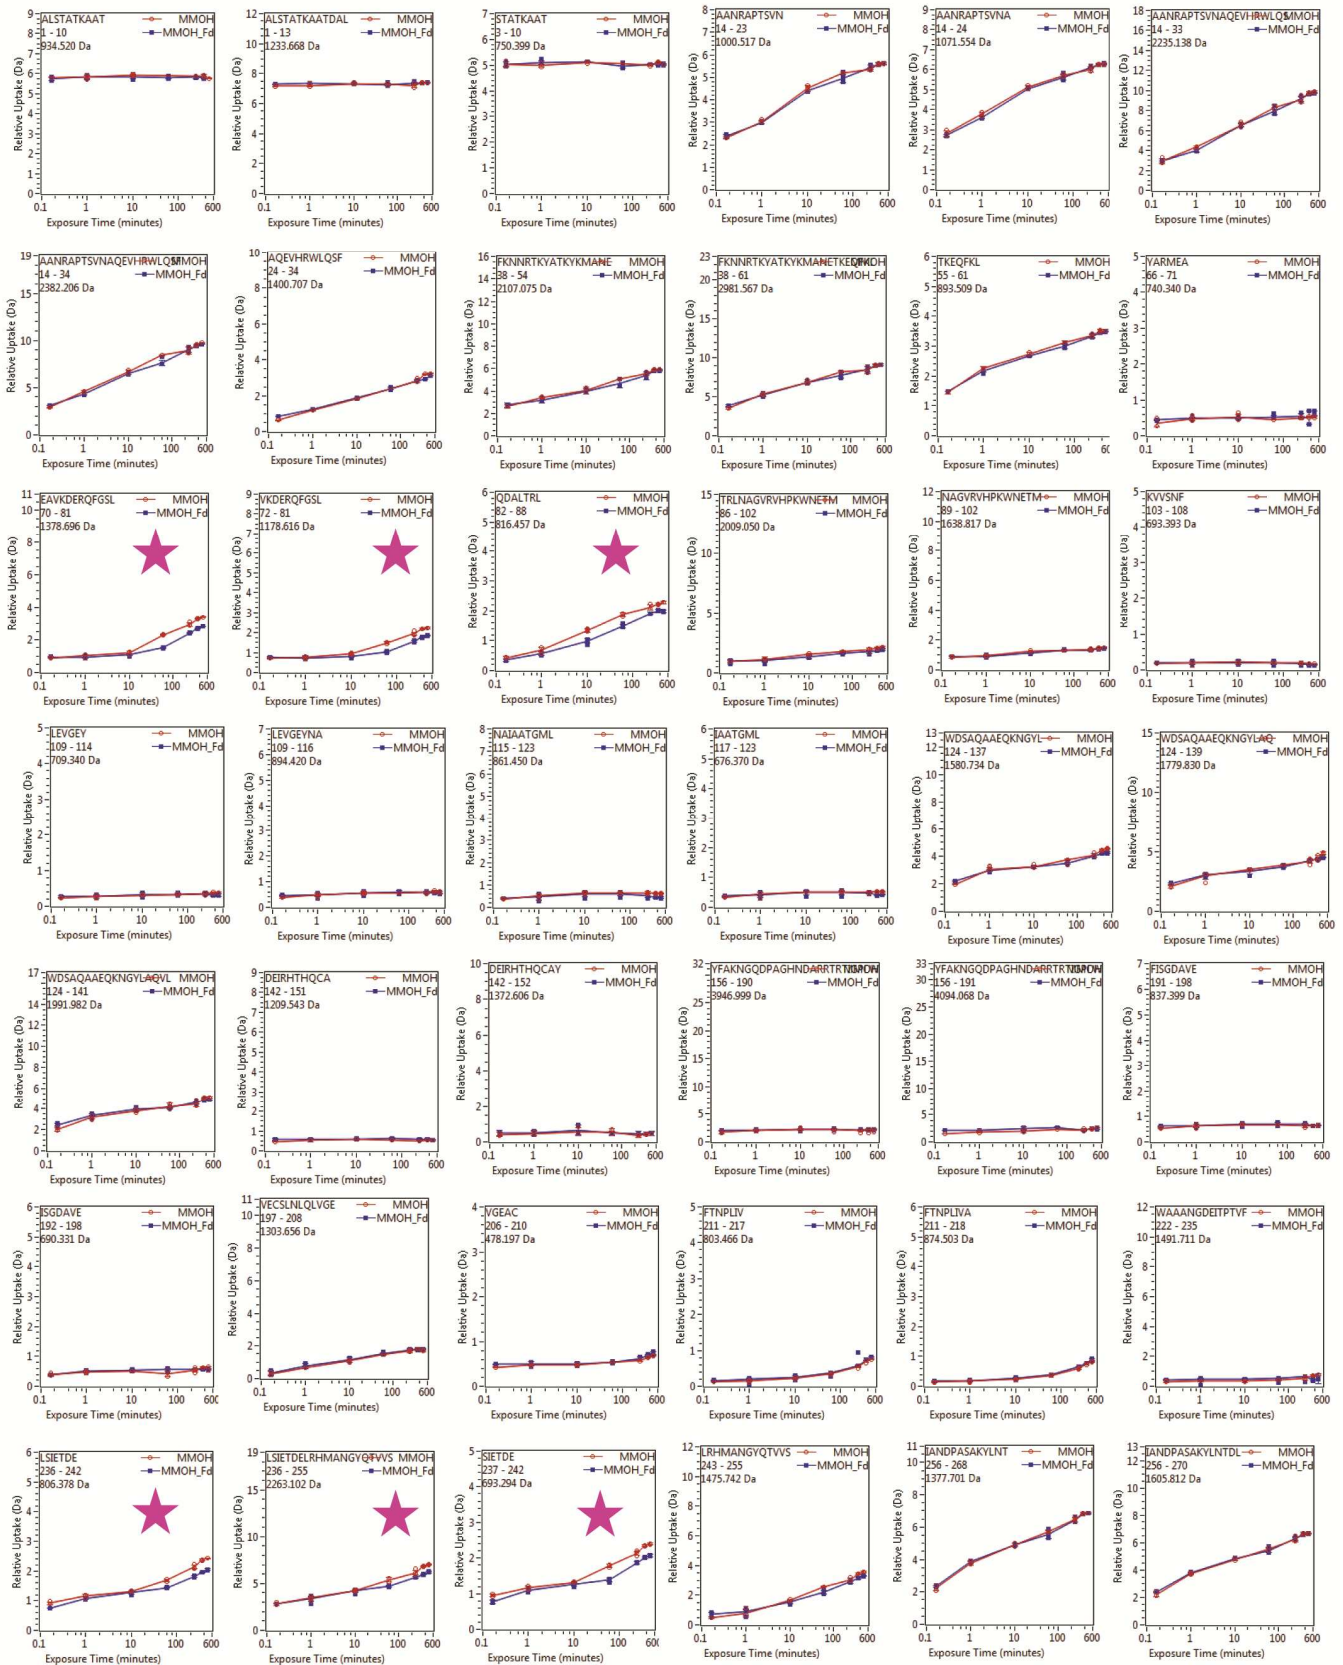

MMOH  $\alpha$ -subunit, continued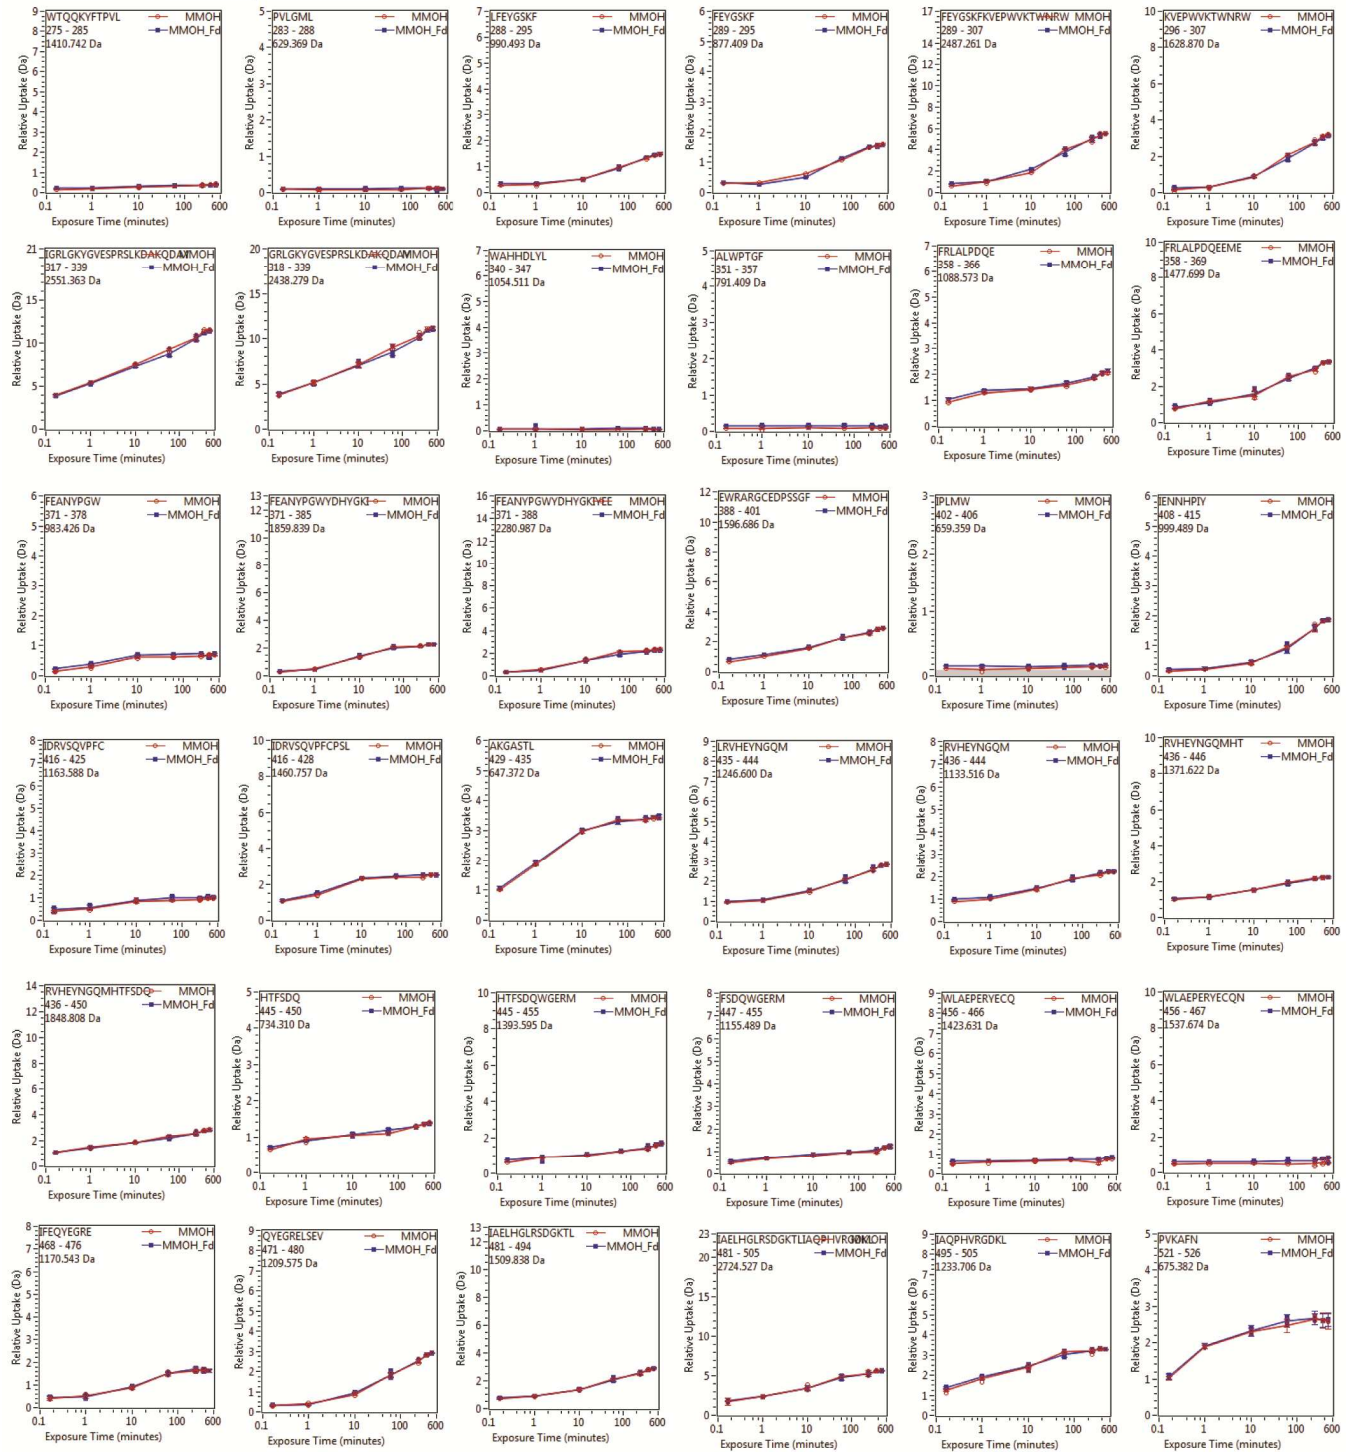



MMOH  $\beta$ -subunit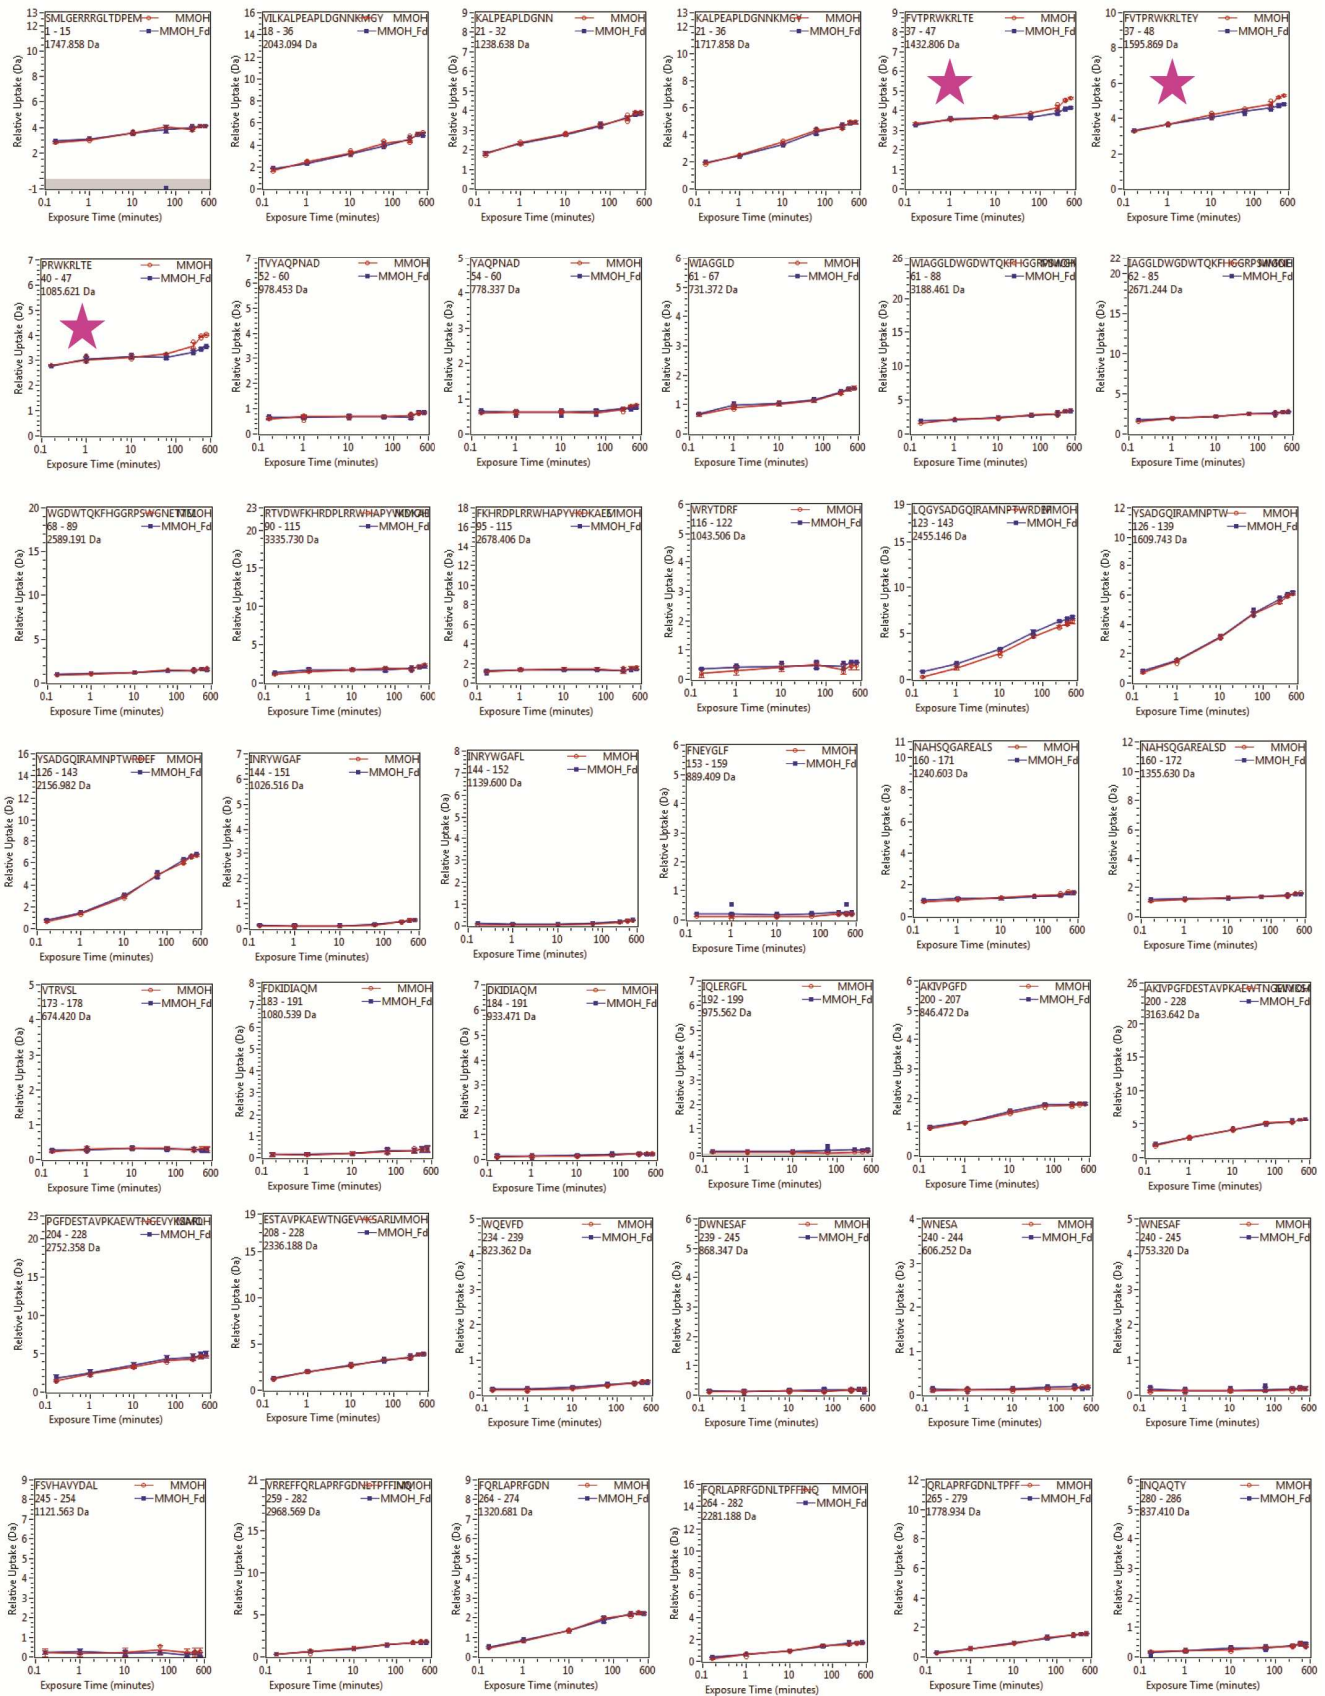

MMOH  $\beta$ -subunit, continued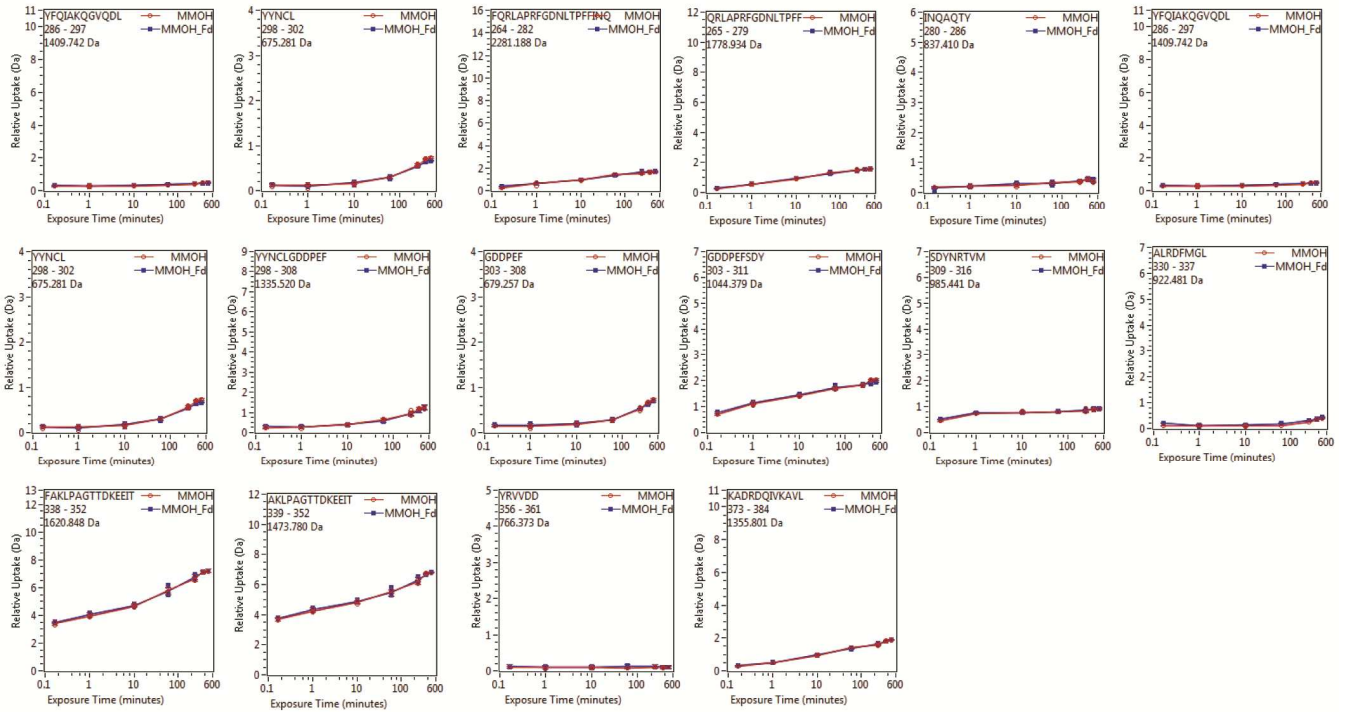

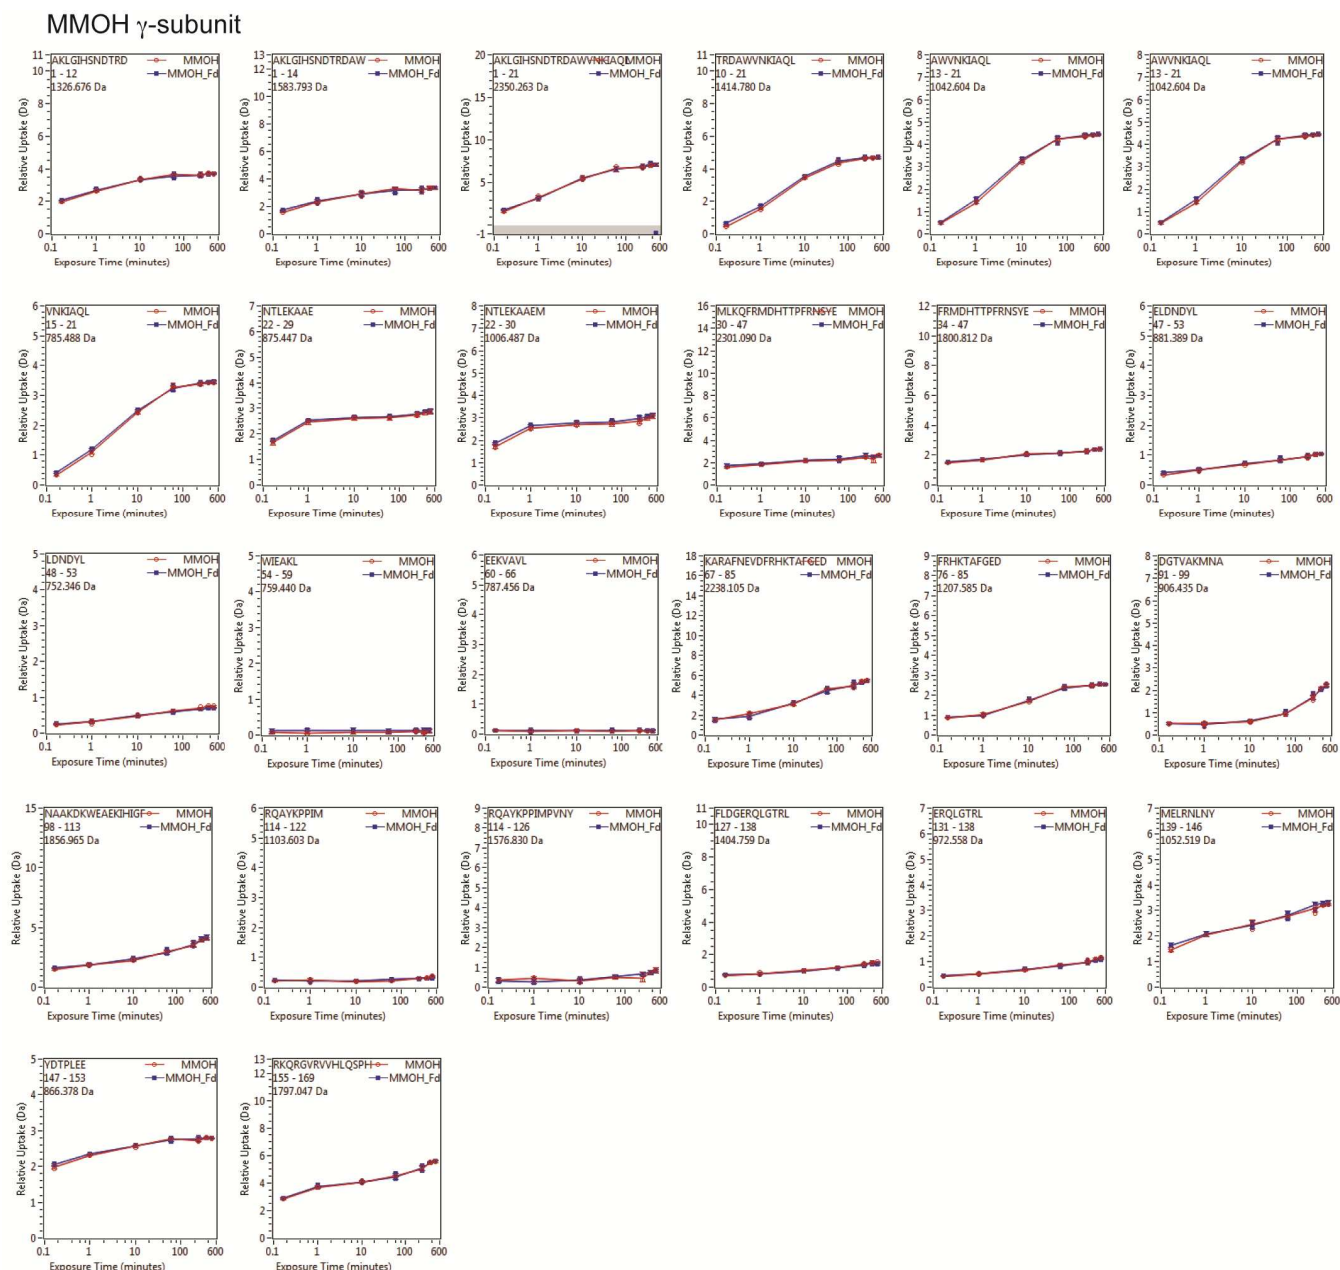

**Figure S2.** Deuterium incorporation graphs for the peptic peptides that were followed by HDX MS for MMOH free (red) and bound to MMOR-Fd (blue). Each data point represents the average of three independent measurements. The magenta stars indicate the regions where differences in deuterium uptake were observed between free MMOH and Fd-bound. The graphs were produced by DynamX 2.0 software (Waters Corp.).

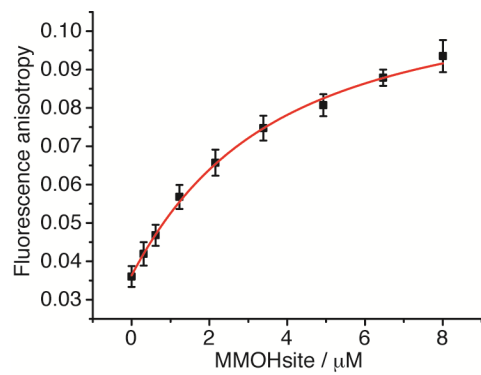

**Figure S3.** Fluorescence anisotropy titration of MMOH into MMOB  $\Delta$ 2-33 labeled with IAEDANS, for  $K_d$  determination.



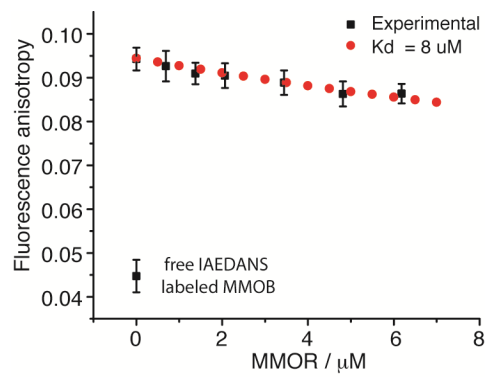

**Figure S4.** Fluorescence anisotropy titration of MMOR into a mixture of 1  $\mu\text{M}$  MMOH and 1  $\mu\text{M}$  IAEDANS labeled full length MMOB.

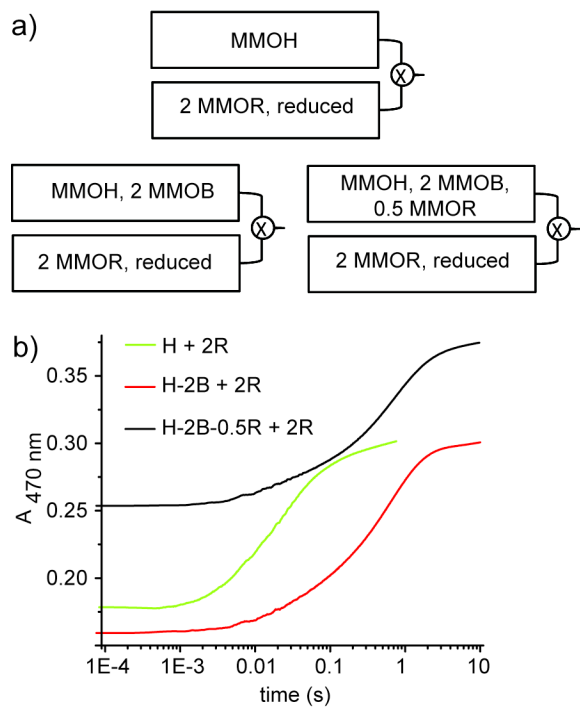

**Figure S5.** MMOB inhibits electron transfer using chemically reduced full length MMOR as the electron source. a) Schematic diagrams for the experimental setups. b) Electron transfer kinetic curves. Wavelength monitored, 458 nm;  $T = 15 \text{ }^\circ\text{C}$ .

**Table S1.** Primers used for making mutant proteins.

| mutant                         | Primers |                                                       |
|--------------------------------|---------|-------------------------------------------------------|
| MMOR ferredoxin domain (1-107) | Forward | 5- GTT TTG GTG AGGTCG GCT AGT AGG AGG CGG AGGTCG -3   |
|                                | Reverse | 5- CGA CCT CCG CCT CCT ACT AGC CGA CCT CAC CAA AAC -3 |
| MMOB $\Delta$ 2-33 D36C        | Forward | 5- GGA GGT ATT ACG ATG GAA AGC GAC ACG GTC GTT C -3   |
|                                | Reverse | 5- GAA CGA CCGTGT CGCTTT CCATCG TAATAC CTC C -3       |
